1 Variation in health visiting for the under 5s: A cross-sectional analysis  
2 of administrative data in England for 2018-2020

3

4 Author details

5

6 Mengyun Liu: UCL Great Ormond Street Institute of Child Health, University College London,  
7 London, WC1N 1EH

8

9 Jenny Woodman: Thomas Coram Research Unit, Social Research Institute, University College  
10 London, London, WC1H 0AA

11

12 Louise Mc Grath-Lone: Thomas Coram Research Unit, Social Research Institute, University  
13 College London, London, WC1H 0AA

14

15 Amanda Clery: UCL Great Ormond Street Institute of Child Health, University College  
16 London, London, WC1N 1EH

17

18 Catherine Bunting: UCL Great Ormond Street Institute of Child Health, University College  
19 London, London, WC1N 1EH

20

21 Samantha Bennett: Strategic Commissioning, Kent County Council, Maidstone, ME14 1XQ

22

23 Sally Kendall: Centre for Health Services Studies, University of Kent, Canterbury, CT2 7NZ

24

25 Jennifer Kirman: Oxford School of Nursing and Midwifery, Oxford Brookes  
26 University, Oxford, OX3 0BP

27

28 Helen Weatherly, Centre for Health Economics, University of York, York, YO10 5DD

29

30 Jane Barlow, Department of Social Policy and Intervention, University of Oxford, Oxford,  
31 OX1 2ER

32

33 Helen Bedford, UCL Great Ormond Street Institute of Child Health, University College  
34 London, London, WC1N 1EH

35

36 Katie Harron: UCL Great Ormond Street Institute of Child Health, University College London,  
37 London, WC1N 1EH

38

**NOTE: This preprint reports new research that has not been certified by peer review and should not be used to guide clinical practice.**

39 **Abstract**

40

41 **Introduction**

42

43 The health visiting service in England leads the delivery of the government's Healthy Child  
44 Programme (HCP) for children under five. However, local authorities and their provider  
45 partners deliver this service differently in respond to the challenges of funding cuts, low  
46 numbers of health visitors and high levels of family needs.

47

48 **Objective**

49

50 We aimed to describe local authority variation in the delivery of health visiting services to  
51 children under 5 in England between 2018 and 2020.

52

53 **Methods**

54

55 We used nationally published statistics on mandated health visiting contacts, and  
56 administrative data from the Community Services Dataset (CSDS) on duration, location, and  
57 medium of delivery of contacts. We mapped the population coverage of mandated contacts  
58 (new birth visit, 6-8-week review, one-year review and 2-2 ½year review), and additional  
59 contacts, and described the frequency and characteristics of contacts across local  
60 authorities.

61

62 **Results**

63

64 According to the published statistics, 99% of eligible children received their new birth visit,  
65 89% received the 6-8-week review and the one-year review, and 82% received the 2-2½-  
66 year review. There was substantial variation across local authorities: coverage for the 2-2½-  
67 year review ranged between 33%-97%. Based on CSDS, 80% of local authorities (n=46/57)  
68 delivered more additional contacts than mandated contacts: on average, 1.6 additional  
69 contacts (range: 0.1-8.5) were delivered for each mandated contact. There was also  
70 significant variation in the duration of contacts and the percentage of contacts delivered  
71 face-to-face and at home.

72

73 **Conclusions**

74

75 Our study demonstrates substantial variation in the delivery of health visiting services across  
76 England, particularly in the delivery of additional contacts. Further research is needed to  
77 explore the extent to which this trend has continued and the reasons for this variation.  
78 There is also a need to exploit this data to further explore the impact of these different  
79 models of service delivery on family outcomes.

80

81 **Keywords**

82 Health visiting, Healthy Child Programme, early years, public health service, proportionate  
83 universalism

84

## 85 Introduction

86

87 The health visiting service in England leads the delivery of the government’s Healthy Child  
88 Programme (HCP) for children under five. The HCP comprises a universal preventative  
89 service and targeted support for families with higher need. [1-4] Health visiting teams are  
90 made up of health visitors (specialist community public health nurses), community staff  
91 nurses, nursery nurses, health care assistants, and other specialist health professionals. [2-  
92 4]

93

94 In England, health visiting teams are mandated to provide five universal health reviews:  
95 during the third trimester of pregnancy (health promoting visit), at child age 10-14 days  
96 (new birth visit), 6-8 weeks (6-8-week review), 12 months (one-year review), and 2-2½ years  
97 (2-2½ year review), each with a schedule of health promotion activities and with a review of  
98 health and development of the child within their family context (Supplementary material A,  
99 Appendix Table A1). [3] These mandated contacts provide an opportunity for health visiting  
100 teams to identify children and families in need of additional support, [3] which can comprise  
101 further additional contacts and/or referral of child and family to specialist services. [2, 3]  
102 Additional contacts might include support for the continuation of breastfeeding or advice on  
103 safer sleep, support for nutrition and accident prevention, or advice on managing minor  
104 illnesses. [3]

105

106 From 2015, the responsibility for commissioning public health services for children aged 0-5,  
107 including health visiting, was transferred from the NHS to local authorities. [5] Local  
108 authorities and their provider partners have faced funding cuts, low numbers of health  
109 visitors and high levels of family need, putting pressure on the service. [4, 6-8] Case studies  
110 and surveys have shown that local authorities have responded differently to these  
111 challenges, leading to additional variation in models of service delivery, priorities, and  
112 capacity. [2, 7, 9] To-date, there have been two analyses of routinely collected data on  
113 health visiting using the national individual-level administrative data on health visiting in  
114 England (the Community Services Dataset; CSDS). One study focused on variation in  
115 coverage and average number of health visiting contacts for children aged 2 years in 2018-9,  
116 by child-level characteristics (ethnicity, deprivation, child safeguarding flags). [10] This study  
117 found that children living in the most deprived neighbourhoods or with  
118 vulnerability markers (e.g. Looked After Child) were less likely to receive their 2–2½ year  
119 health and developmental review than other children but when all additional contacts were  
120 included, the pattern was reversed (deprivation) or disappeared (Looked After Children).  
121 There were no clear patterns by ethnicity and no analyses of local authority variation. [10]  
122 The second study reported similar results, based on a wider age range of children (birth to 3  
123 years) and for two years of data (2018-20) and also reported high variation between local  
124 authorities in the proportion of mandated contacts conducted at home. [11] This current  
125 study adds to the evidence-base by providing a local authority view of health visiting  
126 delivery in terms of relative frequency of mandated to additional contacts from birth to age  
127 5, a more detailed picture of medium and location and for the first time, contact duration  
128 and use of group contacts.

129

130 Our results highlight areas for improvement or investigation, can inform parameters for  
131 national guidance and local area decisions about service commissioning, including by

132 benchmarking their own service. Our analyses also provide a reference point for  
133 international comparisons of child health services in the early years.

134

## 135 [Methods](#)

136

### 137 [Data Sources](#)

138

#### 139 *Health Visiting Service Delivery Metrics (Health Visiting metrics)*

140 Health Visiting metrics are published by the Office of Health Inequalities and Disparities  
141 (OHID), who report local authority-level quarterly experimental statistics on health visiting  
142 service delivery, including the numbers of each mandated contact delivered and the number  
143 of eligible children. [12-14] These quarterly aggregate data are collected from  
144 commissioners of health visiting services in each local authority. [15] Health Visiting metrics  
145 provides the most accurate figures on the coverage of mandated contacts by local  
146 authorities, but does not include information on additional contacts or the format and  
147 duration of contacts . For each of the four postnatal mandated contacts, we extracted the  
148 number completed and the number of eligible children in each LA for two financial years  
149 from April 2018 to March 2020. As these data are experimental, we carried out additional  
150 validation and cleaning to correct reporting errors. [16]

151

#### 152 *Community Services Dataset (CSDS)*

153 CSDS is an individual-level whole-population dataset established by NHS Digital in 2015,  
154 which comprises data on the utilization of all publicly funded community health services in  
155 England by individuals of all ages, including health visiting services. Relevant to this study,  
156 CSDS includes patient personal and demographic characteristics and health visiting activity.  
157 [14, 17]

158

159 We extracted data from CSDS for April 2018 to March 2020. We identified mandated health  
160 visiting contacts using the 'Activity Type' flag entered by the practitioner. [16] Where the  
161 Activity Type was missing (30% of records), we identified any health visiting contact that  
162 took place within a plausible time window for each mandated contact (Supplementary  
163 material A, Appendix Table A2). Additional contacts (i.e., health visiting contacts not defined  
164 as mandated) were identified for children up to 5 years old using the "Service or Team  
165 Type" variable indicating the health visiting service. We excluded contacts that were  
166 labelled as "did not attend".

167

168 CSDS provides detailed information on how contacts are delivered but previous studies  
169 show that data in CSDS is incomplete and submitted inconsistently over time in some local  
170 authorities. [18] We assessed the completeness of CSDS at local authority-quarter level by  
171 comparing it to the Health Visiting metrics to create a "research-ready" dataset. [16] There  
172 were 149 local authorities (health visiting in City of London is delivered by Hackney and Isles  
173 of Scilly by Cornwall), each contributing up to 8 quarters of data, resulting in a maximum of  
174 1,192 local authority-quarters possible for analysis. There were 57 local authorities  
175 (contributing 164 quarterly data points) that had high correlation with the Health Visiting  
176 metrics and were included in the "research-ready" dataset for analysis (Supplementary  
177 material A, Appendix Table A3). This means that we have 'snap shot' data by quarter for  
178 local authorities (Supplementary material A, Appendix Figure A1). The local authorities

179 included in the “research-ready” dataset represent the distribution of regions, urban/rural  
180 status, and deprivation quintiles of England (Supplementary material A, Appendix Table A4).  
181 Further data cleaning is described in Supplementary material B.

182

### 183 Indicators of health visiting delivery

184 We derived a set of local-authority level indicators for each type of health visiting contact  
185 (Supplementary material A, Appendix Table A5) and described the median and range of  
186 these indicators across local authorities. For local authorities with multiple quarters  
187 included in the “research-ready” dataset, we pooled data across quarters.

188

### 189 Analysis

190 The geographic distribution of coverage of mandated contacts was mapped, and box plots  
191 were used to visualise variation in the medium (face-to-face or telephone) and locations (at  
192 home, health and social settings, or children’s centre) of health visiting delivery for both  
193 mandated and additional contacts across local authorities. All counts of individuals were  
194 rounded to the nearest 5 to reduce the risk of identifying individuals. [19]

195

## 196 Results

197

198 All counts of contacts from CSDS have been rounded to the nearest 5 to comply with NHS  
199 statistical disclosure rules for subnational data.

200

### 201 Study sample

202 There were 4,172,835 mandated contacts delivered to children aged 0-5 years between  
203 April 2018 and March 2020 in 149 local authorities, recorded in the Health Visiting metrics  
204 (Supplementary material A, Appendix Table A6). In the “research-ready” CSDS data for the  
205 same period, we included 1,779,155 contacts from 57 local authorities (Supplementary  
206 material Appendix A, Table A6).

207

### 208 Coverage of mandated contacts (Health Visiting Metrics)

209 Coverage of the new birth visit was highest (median coverage of 98.5%, range: 89.9%-  
210 100.0%), followed by the 6-8-week review (median: 88.5%, range: 17.8%-100.0%) and one-  
211 year review (median: 89.0%, range: 19.9%-98.9%; Figure 1). The 2-2½-year review had a  
212 relatively lower coverage (median: 81.5%, range: 33.0%-97.4%). For 29 (19.5%) local  
213 authorities, >20% of eligible children did not receive the 6-8-week review. For 26 (17.4%)  
214 local authorities, >20% of eligible children were not recorded as receiving the one-year  
215 review. For 68 (45.6%) local authorities, >20% of eligible children were not recorded as  
216 receiving the 2-2½-year review and in 5 local authorities, >50% of eligible children were not  
217 recorded as having the 2-2½-year review.

218

### 219 Additional contacts (research-ready CSDS data)

220 Most local authorities (n=46, 80%) reported conducting more additional contacts than  
221 mandated contacts, with a median of 1.6 additional contacts delivered per mandated  
222 contact, and wide variation across local authorities (range 0.1-8.5). The number of  
223 additional contacts per mandated contact varied between 0.6-2.8 in 80% of local  
224 authorities, indicating that this variation was not due to a small number of outlying local  
225 authorities. Local authorities that delivered more health visiting contacts tended to conduct

226 more additional contacts per mandated contact (Supplementary material A, Appendix  
227 Figure A2).

228

229 On average, 61.1% of children who received a health visiting contact received an additional  
230 contact within the year-quarter, but there was high variation across local authorities (range:  
231 3.8%-94.1%). The large variation was not due to extreme values: in 80% of local authorities,  
232 the percentage of children who received a health visiting contact who received an additional  
233 contact within the year-quarter was between 27.2%-75.1%.

234

#### 235 Medium (research-ready CSDS data)

236 The majority (>96%) of mandated contacts were delivered face-to-face (Figure 2). Most  
237 additional contacts were also delivered face-to-face (median 82.7%, range: 47.6%-99.5%).  
238 About half of local authorities (n=23, 44.2%) offered >20% of additional contacts virtually.  
239 Phone calls were also used to deliver additional contacts: 34 local authorities (65%)  
240 delivered >10% of additional contacts through phone calls. Other mediums, including  
241 telemedicine, email, and messages, were rarely used for mandated or additional contacts,  
242 with <3% delivered through these mediums.

243

#### 244 Location (research-ready CSDS data)

245 New birth visits and 6-8-week reviews predominantly took place in the home setting, but  
246 there was substantial variation in the location of one-year reviews, 2-2½-year reviews and  
247 additional face-to-face contacts (Figure 3).

248

#### 249 Duration (research-ready CSDS data)

250 Mandated contacts were typically longer than additional contacts (Table 1), but high  
251 variation existed across local authorities. Face-to-face contacts were longer than phone call  
252 contacts. In more than half of the local authorities with available data on duration, 65% of  
253 new birth visits were at least an hour long, but most local authorities delivered more than  
254 half of other mandated contacts in 30-59 minutes. A considerable percentage of mandated  
255 contacts were recorded as lasting under 30 minutes (median 4.6%-7.9%) or 30-44 minutes  
256 long (median 12.3%-29.6%). Additional contacts were generally short: on average, 36.2% of  
257 additional contacts were completed in under 30 minutes. The duration of both mandated  
258 and additional contacts showed large variations across local authorities.

259

#### 260 Use of group sessions (research-ready CSDS data)

261 Group sessions were rarely used for mandated contacts. Of the 48 local authorities with  
262 information on group sessions, only five (10%) local authorities delivered >2% of new birth  
263 visits, 6-8-week reviews, and one-year reviews in group sessions. The use of group sessions  
264 also varied by local authority and type of contact.

265



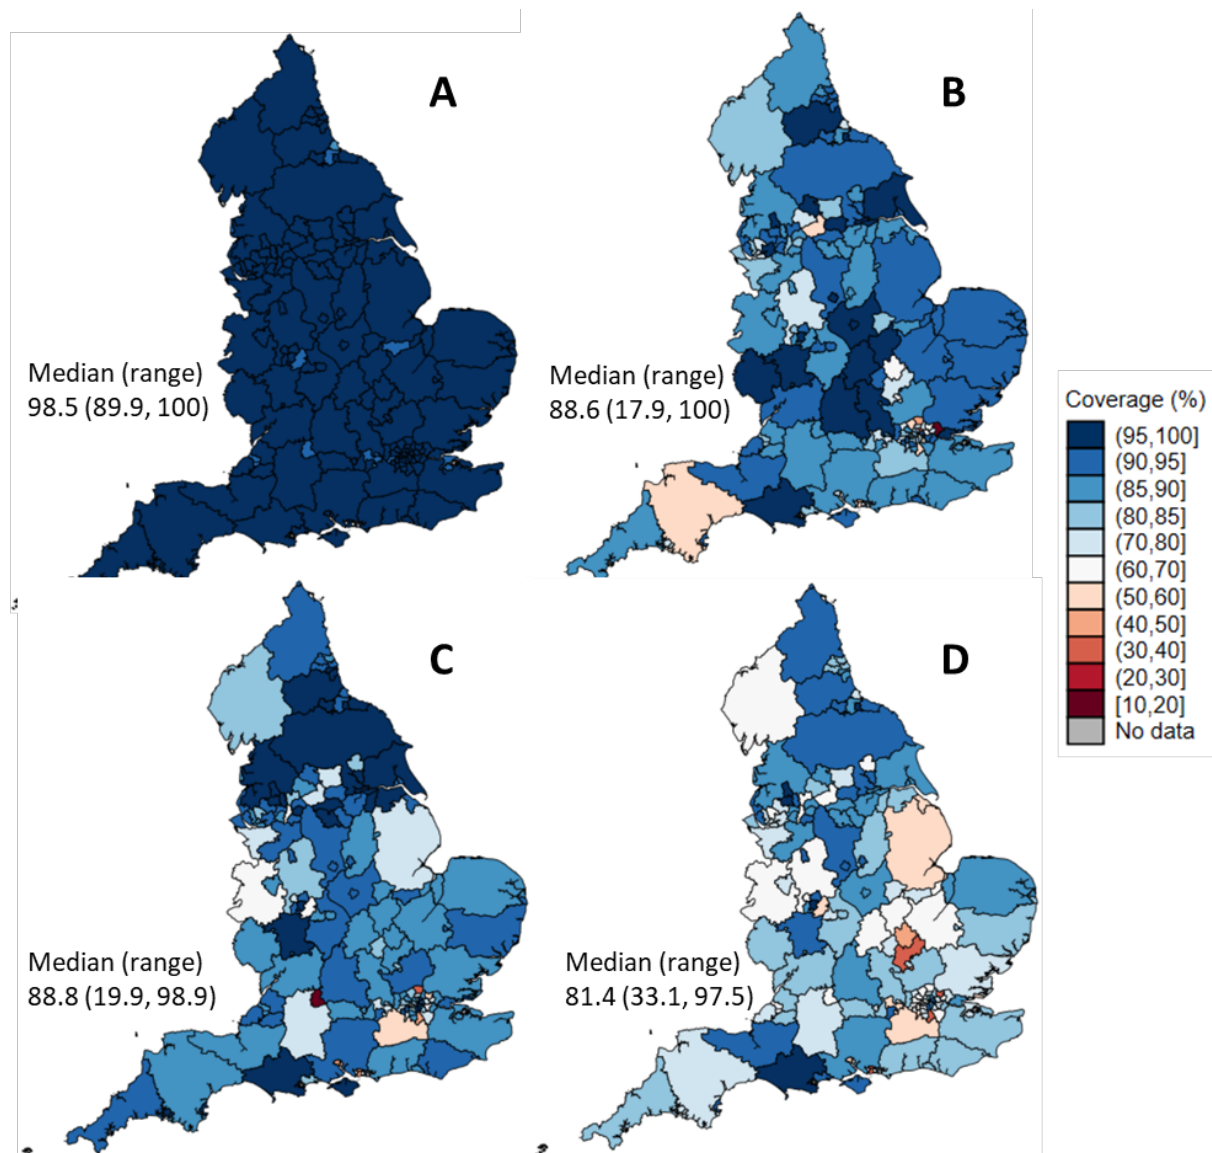

266  
267  
268  
269  
270  
271

**Figure 1. Coverage of mandated health visiting contacts in England based on Health Visiting Metrics, 2018/19-2019/20**  
A: coverage of new birth visit; B: coverage of 6-8-week review; C: coverage of one-year review; D: coverage of 2-2½-year review.

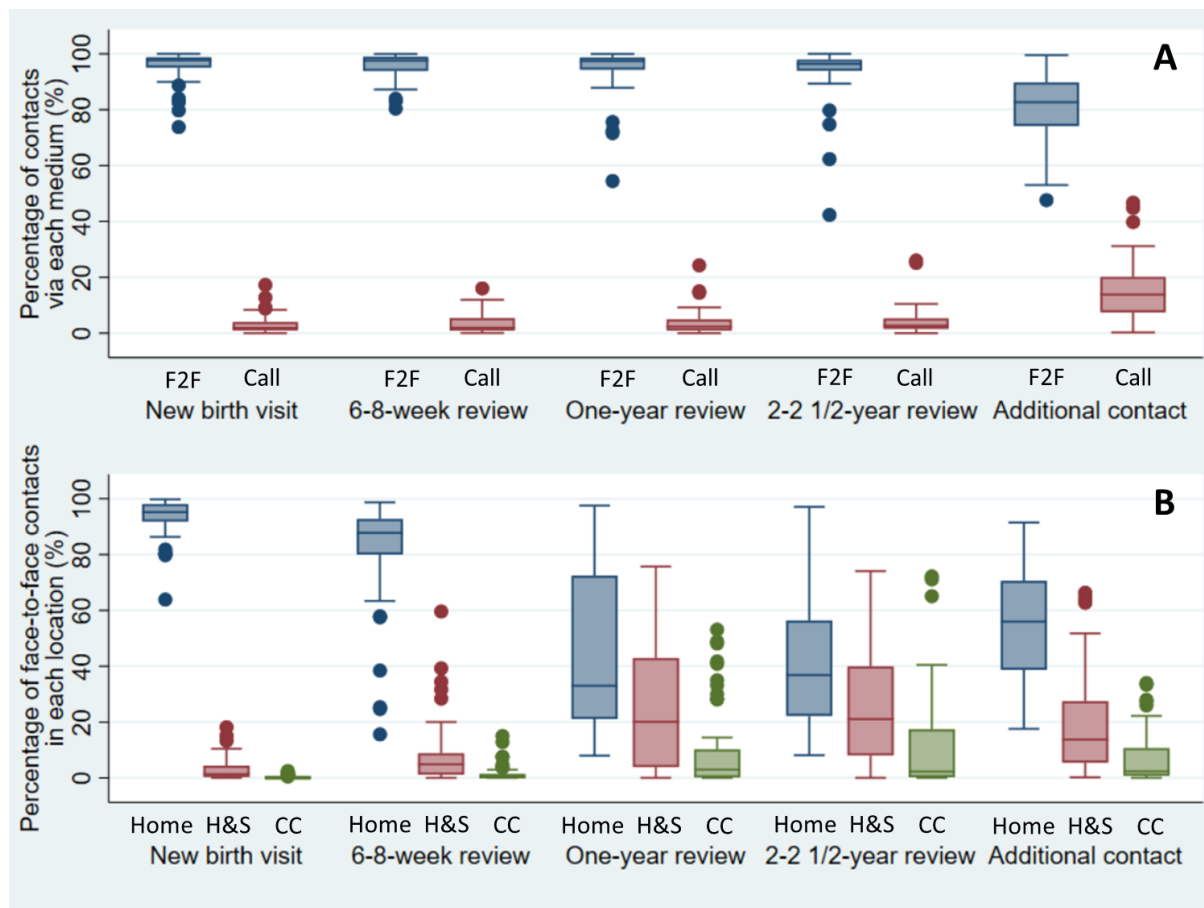

272  
273  
274  
275  
276  
277  
278  
279

**Figure 2: Variation in delivery of health visiting contacts based on research-ready CSDS data. A: Medium of delivery. B: Locations of face-to-face contacts.** N=52 and N=49 local authorities with information about medium and location, respectively. F2F: face-to-face contacts; Call: phone call contacts; H&S: healthcare and social setting; CC: children’s centre

**Table 1. Duration of health visiting contacts in minutes, median duration or median percentage (range across local authorities).** N=50 local authorities with data on duration

|                                                                         | New birth visit  | 6-8-week review | One-year review | 2-2½-year review | Additional contact |
|-------------------------------------------------------------------------|------------------|-----------------|-----------------|------------------|--------------------|
| <b>Overall median duration</b>                                          | 60 (30, 120)     | 45 (10, 60)     | 45 (20, 60)     | 45 (30, 90)      | 30 (5, 90)         |
| <b>Median duration by medium (minutes)</b>                              |                  |                 |                 |                  |                    |
| Face-to-face                                                            | 60 (30, 120)     | 45 (10, 60)     | 45 (20, 60)     | 45 (30, 75)      | 30 (5, 105)        |
| Phone calls                                                             | 17.5 (5, 60)     | 30 (5, 60)      | 25 (5, 120)     | 22.5 (5, 75)     | 15 (5, 30)         |
| Other                                                                   | 52.5 (12.5, 120) | 45 (5, 95)      | 40 (10, 60)     | 42.5 (5, 90)     | 24.5 (5, 60)       |
| <b>Median duration by locations for face-to-face contacts (minutes)</b> |                  |                 |                 |                  |                    |
| Home                                                                    | 60 (30, 120)     | 45 (30, 60)     | 60 (30, 60)     | 60 (35, 75)      | 45 (30, 60)        |
| Healthcare & social settings                                            | 60 (10, 120)     | 30 (10, 60)     | 45 (10, 60)     | 45 (30, 90)      | 25 (3, 120)        |



|                                                                 |                  |                  |                  |                  |                  |
|-----------------------------------------------------------------|------------------|------------------|------------------|------------------|------------------|
| Children's centre                                               | 30 (3, 60)       | 30 (3, 120)      | 40 (10, 75)      | 45 (20, 90)      | 30 (3, 120)      |
| Other                                                           | 60 (10, 75)      | 30 (10, 75)      | 45 (3, 60)       | 45 (30, 90)      | 45 (3, 120)      |
| <b>Median percentage of contacts in duration categories (%)</b> |                  |                  |                  |                  |                  |
| 0-29 minutes                                                    | 4.6 (0.2, 32.5)  | 7.9 (0.2, 92.8)  | 7.8 (0.5, 84.9)  | 5.7 (0.3, 29.8)  | 36.2 (3.8, 83.0) |
| 30-44 minutes                                                   | 12.3 (0.6, 88.5) | 29.6 (0.7, 89.0) | 21.1 (1.7, 83.3) | 14.8 (1.1, 87.3) | 13.4 (4.0, 54.9) |
| 45-59 minutes                                                   | 8.5 (0.3, 40.1)  | 15.2 (0.5, 84.6) | 28.0 (0.8, 85.1) | 25.9 (0.9, 89.6) | 5.8 (1.0, 16.7)  |
| >=60 minutes                                                    | 65.0 (4.1, 96.4) | 31.1 (0.9, 94.4) | 19.5 (1.4, 89.5) | 31.7 (2.2, 91.2) | 30.2 (4.6, 80.7) |

280

## 281 Discussion

282

### 283 Key Findings

284 Between 2018-2020, the new birth visit was delivered with almost universal coverage but  
 285 variation across England existed in the coverage of the 6-8-week, one-year, and 2-2½-year  
 286 reviews. The high coverage of new birth visits and lower coverage of 2-2½-year review are  
 287 consistent with previous studies using CSDS. [10, 11] However, our results also demonstrate  
 288 that much of the reported activity was being delivered outside of mandated contacts, with  
 289 80% of local authorities delivering more additional than mandated contacts. The duration  
 290 and way in which these additional contacts are delivered, for example by telephone or face-  
 291 to-face, also varied across areas, which has not previously been described.

292

### 293 Implications

294 There have been many years of austerity, cuts and a depleted workforce: since 2015 the real  
 295 term value of the public health grant (from which health visiting is commissioned) has fallen  
 296 by 26% [20] and the health visiting workforce has decreased by 37% from 11,193 in 2015 to  
 297 7,030 in 2022. [21] Despite this, health visiting teams during 2018-2020 were reaching  
 298 nearly all babies and most children face-to-face, and conducting over one and a half times  
 299 the number of additional contacts relative to mandated contacts. This represents a  
 300 significant public health infrastructure to support the health and development of babies and  
 301 children and the wellbeing of their families in the critical period before school. Our study  
 302 highlights the importance of taking into account additional contacts when measuring health  
 303 visiting activity. Additional contacts, to address identified need, were the most frequent  
 304 type of contact (though shorter and more likely to be on the phone than the mandated  
 305 reviews) in our analysis. This is consistent with other evidence about significant health  
 306 visiting activity outside the mandated contacts in England, including a birth cohort study (of  
 307 children born in 2020) which reported that 27% of 8628 families had four or more contacts  
 308 with the health visiting team in the first 9 months of their child's life. [22] However, there  
 309 was substantial variation in the frequency, duration and medium of additional contacts,  
 310 which is unlikely to be completely explained by differences in underlying need of the  
 311 families across areas. Other factors that may have contributed to this variation include local  
 312 service specifications and service priority, budgets, personnel capacity, and the availability  
 313 of other local services. [23] Other evidence suggests that despite substantial 'additional'

314 contacts, not all identified need can be followed up by the health visiting team: in a survey  
315 of 1186 health visitors, 45% reported that mandated contacts were prioritised over targeted  
316 or specialist support and 79% said that the service lacked capacity to offer a package of  
317 support to all children with identified needs. [24] Further qualitative work with parents and  
318 professionals is needed to understand the experiences and perceived purpose and impact of  
319 different types of additional contacts, as well as why models of additional contact are so  
320 different across areas.

321  
322 Our results can inform conversations at the national and local level about the parameters of  
323 a ‘good’ health visiting service during a time when early years is a priority area, with  
324 targeted funding and innovation (e.g., Start for Life and Family Hubs [25]). For example, our  
325 findings raise a question about whether a mandated review can be adequately conducted in  
326 less than 45 minutes, given that it should include a direct observation of the child and  
327 significant health promotion activity. In this pre-Covid data we found that a considerable  
328 percentage of mandated contacts were recorded as lasting under 30 minutes (median 5%-  
329 8%, Table 1) or 30 to 44 (median 12%-30%) minutes. Providers, commissioners and national  
330 policy teams should consider how far features of delivery such as <30 minute or <45 minute  
331 mandated contacts are consistent with the way health visiting is theorised to work. In other  
332 words, is there a minimum time feasibly needed for health visitors or members of their  
333 team to build relationships with parents (including those with a mistrust of services), work  
334 in partnership with families, undertake health promotion work and conduct a holistic needs  
335 assessment of the whole family and family environment? It is possible that some features of  
336 service delivery, such as the shorter mandated contacts, are a service response to resource  
337 pressure which have the unintended consequence of undermining the mechanisms by  
338 which health visiting is thought to work and influence family outcomes. Next steps in  
339 building the evidence-base for national and local decision makers is to understand local  
340 authority variation in delivery to different types of families, including those living in  
341 deprivation or with other indicators of vulnerability, and the impact of decisions about  
342 service delivery on outcomes. [26, 27] As our study involved the use of data that was  
343 collected in the pre-pandemic era, we also now need to investigate how far the service  
344 delivery has ‘bounced back’ or has been permanently changed following the partial stop of  
345 health visiting services and widespread redeployment of staff and a change to virtual  
346 contacts. [28-31]

347

348

#### 349 Strengths and limitations

350 A strength of our study is that we used a subset of nationally representative data with high  
351 levels of completeness to monitor and measure the coverage, medium, location, duration of  
352 contacts, the delivery of additional contacts and use of group sessions. For estimates of  
353 coverage of mandated visits, we used aggregate Health Visiting metrics that cover every  
354 local authority in England. For the other characteristics of health visiting service delivery, we  
355 only included local authorities that correlated with health visiting activity recorded in the  
356 Health Visiting metrics (research-ready CSDS data). This means that misclassification of non-  
357 health visiting activity as mandated contacts for records with missing values on Activity Type  
358 is likely to be marginal.

359

360 Data quality remains an issue. First, we may not have identified all health visiting contacts in  
361 the CSDS, due to missing data in the “Service or Team Type” variable. This was likely a bigger  
362 issue for additional contacts, because we had no alternative method of identifying these  
363 (unlike mandated contacts for which we could use the “Activity Type” variable). [16]  
364 However, our study actually found a higher number of additional contacts than reported by  
365 other analyses of CSDS, which found 0.3 additional contacts per mandated contact for  
366 children between April 2019-March 2020 (compared to 1.6 in our study). [32] This may be  
367 explained by different ways of cleaning and curating the data: our research-ready data  
368 described health visiting on a subset of local authorities with more complete health visiting  
369 data, which may be associated with higher health visiting activity. There might also be  
370 misclassification between mandated and additional contacts: some local authorities offer  
371 more than five mandated contacts to every child and these extra “mandated contacts” will  
372 be identified as additional contacts in our analysis. Results about the use of additional  
373 contacts thus need to be interpreted with caution.

374  
375 Results about the shortest mandated contacts should also be treated with caution (median  
376 5%-8% of mandated contacts were recorded as under 30 minutes, Table 1). It is possible  
377 that some of these contacts were flagged as mandated contacts but were in fact initial  
378 conversations to schedule or prepare for a longer contact, which could have taken place  
379 shortly afterwards and covered some or all of the relevant mandated content. There is some  
380 evidence to support this hypothesis from our unpublished longitudinal analysis for a related  
381 health visiting project: [26] we found that 24% of children had an additional health visiting  
382 contact within two weeks of their new birth visit, but 41% of children with a new birth visit  
383 under 30 minutes had an additional contact within two weeks. Although the new birth visits  
384 under 30 minutes duration were more likely to be followed up within two weeks, most were  
385 not.

386  
387 Second, we can only report on local authorities included in the research-ready dataset and  
388 we cannot assume that these findings are generalisable to local authorities with incomplete  
389 CSDS data. [10] The distribution of regions, urban/rural status, and deprivation quintiles in  
390 our analysis is representative to that in England (Supplementary material A, Appendix Table  
391 A4). Our findings are largely based on a few months of data within each area, as more than  
392 half of local authorities (n=31, 54.4%) included in the research-ready dataset only  
393 contributed one or two year-quarters. The sample selection largely depended on good  
394 reporting of data, which might be associated with good services. However, the coverage of  
395 mandated contacts is similar between the research-ready datasets and the whole dataset  
396 (Supplementary material A, Appendix Figure A3) and the median duration of 45-60 minutes  
397 for mandated contacts and 30 minutes for additional contacts is consistent with the average  
398 duration of 42 minutes pooling mandated and additional contacts together reported by  
399 health-visiting providers in a survey. [33]

400  
401 Third, we were unable to conduct longitudinal analyses in this research-ready dataset, as a  
402 result of using the quarterly Health Visiting metrics as a reference to assess the  
403 completeness of CSDS (Supplementary material A, Appendix Figure A1). This means we were  
404 unable to describe the average number of contacts per child or patterns of contacts over  
405 early childhood.

406

407 Finally, as this study describes different aspects of service delivery independently, the  
408 association between them is not clear. For example, we do not yet know whether local  
409 authorities with a high coverage of mandated contacts had more additional contacts per  
410 mandated contact, or whether those who offered more additional contact per mandated  
411 contact had generally shorter contacts. Further exploration of models of service delivery  
412 combining different aspects together will help draw a more comprehensive picture of health  
413 visiting service delivery in England.

414

## 415 Conclusion

416 This study demonstrates substantial variation in the delivery of health visiting across  
417 England, with potential unmet need in some local authorities. Further work is needed to  
418 explore whether this trend has continued in more recent years, and if so, the reasons for  
419 (for example, local specification and staff capacity) and determinants of (for example,  
420 urban/rural status and deprivation) this variation; it also provides a natural opportunity to  
421 exploit this variation to understand the impact of different models of service delivery on  
422 family outcomes.

423

424 This national picture of health visiting should be used by local authorities to review their  
425 own practice based on data in local systems, compare their practice with the national  
426 statistics and identify areas for improvement. [27] Such comparisons would generate  
427 hypotheses about the causes of outliers in terms of whether this is due to commissioning  
428 decisions or to the level of need and availability of other services in the area.

429

430 We demonstrate that with careful validation and cleaning, administrative data can be used  
431 to create a national picture of health visiting that can be used for research, monitoring and  
432 evaluation. However, we also highlight the need for data reporting and transfer systems to  
433 be strengthened in order to improve completeness and representativeness of these data to  
434 support future analyses.

#### 435 [Acknowledgements and funding](#)

436 This study/project is funded by the NIHR Public Health Research Programme (NIHR129901).  
437 This research was supported in part by the NIHR Great Ormond Street Hospital Biomedical  
438 Research Centre. This research benefits from and contributes to the NIHR Children and  
439 Families Policy Research Unit but was not commissioned through this Policy Research Unit  
440 (PR-PRU-1217-21301).

441  
442 The views expressed are those of the author(s) and not necessarily those of the NIHR or the  
443 Department of Health and Social Care.

444  
445 We thank study Steering Committee membership: Dr Louise Marryat, Donjeta Baliu, Dr  
446 Annie Herbert, Dr Toity Deave and Prof John Macleod. Thank you to Dr Cheryll Adams, CBE  
447 and Alison Morton for advice and input. We are grateful to all the Local Authority  
448 commissioners and NHS providers of health visiting services who met with us to sense-check  
449 our methods and interpretation of results.

450

#### 451 [Statement on Conflicts of Interest](#)

452 The authors declare no conflicts of interest.

453

#### 454 [Ethics Statement](#)

455 This study has been approved by University College London Institute of Education (UCL IOE)  
456 Research Ethics Committee (1531).

457

#### 458 [Data Availability Statement](#)

459 Access to the CSDS was approved and provided by NHS England (NIC-393510 and NIC-  
460 381972). Health Visiting Service Delivery Metrics data are published by the Office for Health  
461 Improvement and Disparities and are openly available: data for 2018/19 [12] can be found  
462 at [https://www.gov.uk/government/statistics/health-visitor-service-delivery-metrics-2018-](https://www.gov.uk/government/statistics/health-visitor-service-delivery-metrics-2018-to-2019)  
463 [to-2019](https://www.gov.uk/government/statistics/health-visitor-service-delivery-metrics-2018-to-2019) and data for 2019/20 [13] can be found at  
464 [https://www.gov.uk/government/statistics/health-visitor-service-delivery-metrics-](https://www.gov.uk/government/statistics/health-visitor-service-delivery-metrics-experimental-statistics-2019-to-2020-annual-data)  
465 [experimental-statistics-2019-to-2020-annual-data](https://www.gov.uk/government/statistics/health-visitor-service-delivery-metrics-experimental-statistics-2019-to-2020-annual-data).

466

#### 467 [Supplementary Appendices](#)

468

#### 469 **Supplementary Material A. Tables and Figures**

470

471 Appendix Table A1. Focuses of each universal health review

472 Appendix Table A2. Coding of date-derived mandated health visiting contacts in the  
473 Community Service Dataset

474 Appendix Table A3. Local-authority-quarters included in the research-ready subset (with  
475 overall highly complete data on Health Visiting contacts in CSDS compared to the Health  
476 Visiting metrics)

477 Appendix Figure A1. Illustration of the selection of research ready dataset in an imaginary  
478 local authority

479 Appendix Table A4. The distribution of regions, urban/rural status, deprivation quintiles in  
480 local authorities included and not included in research ready dataset, N (%)

481 Appendix Table A5. Calculation of local-authority-quarter level indicator  
482 Appendix Table A6. Characteristics of study sample in the Community Services Dataset  
483 “research-ready data”  
484 Appendix Figure A2. Scatter plots showing the pattern of the number of additional contacts  
485 per mandated contact with the size of local authority, grouped by provider type (N=55)  
486 Appendix Figure A3. Distribution of coverage of mandated contacts at the local-authority  
487 level, comparing “research-ready” dataset and the whole dataset, April 2018-March 2020  
488

## 489 **Supplementary Material B. Data cleaning and management process**

490  
491 Appendix Table B1. Missingness in variables relevant to Health Visiting service delivery in  
492 CSDS for research-ready dataset  
493 Appendix Table B2. Recategorization of the medium and location of contacts  
494

## 495 **References**

- 496 1. Department for Health. Healthy Child Programme. Pregnancy and the First Five  
497 Years. 2009. Available from: [https://www.gov.uk/government/publications/healthy-child-](https://www.gov.uk/government/publications/healthy-child-programme-pregnancy-and-the-first-5-years-of-life)  
498 [programme-pregnancy-and-the-first-5-years-of-life](https://www.gov.uk/government/publications/healthy-child-programme-pregnancy-and-the-first-5-years-of-life).
- 499 2. Local Government Association. Health visiting: giving children the best start in life.  
500 2019. Available from: [https://www.local.gov.uk/publications/health-visiting-giving-children-](https://www.local.gov.uk/publications/health-visiting-giving-children-best-start-life)  
501 [best-start-life](https://www.local.gov.uk/publications/health-visiting-giving-children-best-start-life).
- 502 3. Public Health England. Health visiting and school nursing service delivery model.  
503 2021. Available from: [https://www.gov.uk/government/publications/commissioning-of-](https://www.gov.uk/government/publications/commissioning-of-public-health-services-for-children/health-visiting-and-school-nursing-service-delivery-model)  
504 [public-health-services-for-children/health-visiting-and-school-nursing-service-delivery-](https://www.gov.uk/government/publications/commissioning-of-public-health-services-for-children/health-visiting-and-school-nursing-service-delivery-model)  
505 [model](https://www.gov.uk/government/publications/commissioning-of-public-health-services-for-children/health-visiting-and-school-nursing-service-delivery-model).
- 506 4. Local Government Association. Improving outcomes for children and families in the  
507 early years: a key role for health visiting services.  
508 2017.[https://www.local.gov.uk/publications/improving-outcomes-children-and-families-](https://www.local.gov.uk/publications/improving-outcomes-children-and-families-early-years-key-role-health-visiting-services)  
509 [early-years-key-role-health-visiting-services](https://www.local.gov.uk/publications/improving-outcomes-children-and-families-early-years-key-role-health-visiting-services)
- 510 5. Department of Health, Public Health England, NHS England, Health Education  
511 England, Local Government Association. Factsheet on Health Visiting and commissioning of  
512 public health services for 0 to 5 year olds. 2014.
- 513 6. Institute of Health Visiting. Survey confirms babies and young children have been  
514 forgotten and failed in the nation’s pandemic response. 2020. Available from:  
515 [https://ihv.org.uk/news-and-views/news/survey-confirms-babies-and-young-children-have-](https://ihv.org.uk/news-and-views/news/survey-confirms-babies-and-young-children-have-been-forgotten-and-failed-in-the-nations-pandemic-response/)  
516 [been-forgotten-and-failed-in-the-nations-pandemic-response/](https://ihv.org.uk/news-and-views/news/survey-confirms-babies-and-young-children-have-been-forgotten-and-failed-in-the-nations-pandemic-response/).
- 517 7. Institute of Health Visiting. State of Health Visiting in England: we need more health  
518 visitors. 2021.<https://ihv.org.uk/our-work/publications-reports/>
- 519 8. Bryar RM, Cowley DS, Adams CM, Kendall S, Mathers N. Health visiting in primary  
520 care in England: a crisis waiting to happen? *Br J Gen Pract*. 2017;**67**(656):102-  
521 [3.10.3399/bjgp17X689449](https://doi.org/10.3399/bjgp17X689449)
- 522 9. Whittaker K, Appleton JV, Peckover S, Adams C. Organising health visiting services in  
523 the UK: Frontline perspectives. *Journal of Health Visiting*. 2021;**9**(2):68-  
524 [75.10.12968/johv.2021.9.2.68](https://doi.org/10.12968/johv.2021.9.2.68)
- 525 10. Fraser C, Harron K, Barlow J, Bennett S, Woods G, Shand J, et al. Variation in health  
526 visiting contacts for children in England: cross-sectional analysis of the 2-2(1/2) year review



- 527 using administrative data (Community Services Dataset, CSDS). *BMJ Open*.  
528 2022;12(2):e053884.10.1136/bmjopen-2021-053884
- 529 11. Amanda C, Jenny W, Helen B, Katie H. P53 Factors associated with delivery of health  
530 visiting contacts to families with children under 5 in England: analysis of administrative data.  
531 *Journal of Epidemiology and Community Health*. 2023;77(Suppl 1):A77.10.1136/jech-2023-  
532 SSMabstracts.158
- 533 12. Public Health England. Health visitor service delivery metrics: 2018 to 2019  
534 2019. [www.gov.uk/government/statistics/health-visitor-service-delivery-metrics-2018-to-](http://www.gov.uk/government/statistics/health-visitor-service-delivery-metrics-2018-to-2019)  
535 2019 [Accessed 19.02.20]
- 536 13. Public Health England. Health visitor service delivery metrics: 2019 to 2020 annual  
537 data. 2020. [https://www.gov.uk/government/statistics/health-visitor-service-delivery-](https://www.gov.uk/government/statistics/health-visitor-service-delivery-metrics-experimental-statistics-2019-to-2020-annual-data)  
538 [metrics-experimental-statistics-2019-to-2020-annual-data](https://www.gov.uk/government/statistics/health-visitor-service-delivery-metrics-experimental-statistics-2019-to-2020-annual-data)
- 539 14. Public Health England. Health visitor service metrics and outcomes definitions from  
540 CSDS. 2018. [www.gov.uk/government/publications/health-visitor-service-metrics-and-](http://www.gov.uk/government/publications/health-visitor-service-metrics-and-outcomes-definitions-from-csds)  
541 [outcomes-definitions-from-csds](http://www.gov.uk/government/publications/health-visitor-service-metrics-and-outcomes-definitions-from-csds) [Accessed 19.02.20]
- 542 15. Public Health England. Children's public health 0 to 5 years : interim national  
543 reporting process for the universal health visiting service : full guidance for local authority  
544 members of staff 2019/20. 2019. Available from: <https://dera.ioe.ac.uk/id/eprint/34143/>.
- 545 16. Amanda C, Catherine B, Mengyun L, Katie H, Jenny W, Louise MG-L. Data Note:  
546 Accounting for data quality when analysing experimental administrative data: lessons  
547 learned from using the Community Services Dataset to understand health visiting in England  
548 [Manuscript submitted for publication]
- 549 17. NHS Digital. Community services data set technical output specification. 2018.  
550 Available from: [https://digital.nhs.uk/data-and-information/data-collections-and-data-](https://digital.nhs.uk/data-and-information/data-collections-and-data-sets/data-sets/communityservices-data-set/community-services-data-set-technical-outputs-specification)  
551 [sets/data-sets/communityservices-data-set/community-services-data-set-technical-](https://digital.nhs.uk/data-and-information/data-collections-and-data-sets/data-sets/communityservices-data-set/community-services-data-set-technical-outputs-specification)  
552 [outputs-specification](https://digital.nhs.uk/data-and-information/data-collections-and-data-sets/data-sets/communityservices-data-set/community-services-data-set-technical-outputs-specification).
- 553 18. Fraser C, Harron K, Barlow J, Bennett S, Woods G, Shand J, et al. How can we use the  
554 community services dataset (CSDS) for research into health visiting? Available at  
555 [https://www.ucl.ac.uk/children-policy-research/sites/children-policy-](https://www.ucl.ac.uk/children-policy-research/sites/children-policy-research/files/using_csds_for_research_report_08.10.20.pdf)  
556 [research/files/using\\_csds\\_for\\_research\\_report\\_08.10.20.pdf](https://www.ucl.ac.uk/children-policy-research/sites/children-policy-research/files/using_csds_for_research_report_08.10.20.pdf) [last accessed 14.01.21]. 2020.
- 557 19. NHS Digital. Disclosure control methodology for Hospital Episode Statistics (HES) and  
558 Emergency Care Data Set (ECDS). 2023. Available from: [https://digital.nhs.uk/data-and-](https://digital.nhs.uk/data-and-information/data-tools-and-services/data-services/hospital-episode-statistics/disclosure-control-methodology-for-hospital-episode-statistics-and-emergency-care-data-set)  
559 [information/data-tools-and-services/data-services/hospital-episode-statistics/disclosure-](https://digital.nhs.uk/data-and-information/data-tools-and-services/data-services/hospital-episode-statistics/disclosure-control-methodology-for-hospital-episode-statistics-and-emergency-care-data-set)  
560 [control-methodology-for-hospital-episode-statistics-and-emergency-care-data-set](https://digital.nhs.uk/data-and-information/data-tools-and-services/data-services/hospital-episode-statistics/disclosure-control-methodology-for-hospital-episode-statistics-and-emergency-care-data-set).
- 561 20. Finch D, Vriend M. Public health grant: What it is and why greater investment is  
562 needed. 2023. Available from: [https://www.health.org.uk/news-and-comment/charts-and-](https://www.health.org.uk/news-and-comment/charts-and-infographics/public-health-grant-what-it-is-and-why-greater-investment-is-needed)  
563 [infographics/public-health-grant-what-it-is-and-why-greater-investment-is-needed](https://www.health.org.uk/news-and-comment/charts-and-infographics/public-health-grant-what-it-is-and-why-greater-investment-is-needed).
- 564 21. Visiting IoH. Health visitor workforce numbers in England reach an all-time low.  
565 2022. Available from: [https://ihv.org.uk/news-and-views/news/health-visitor-workforce-](https://ihv.org.uk/news-and-views/news/health-visitor-workforce-numbers-in-england-reach-an-all-time-low/)  
566 [numbers-in-england-reach-an-all-time-low/](https://ihv.org.uk/news-and-views/news/health-visitor-workforce-numbers-in-england-reach-an-all-time-low/).
- 567 22. Department of Education. Children of the 2020s: first survey of families at age 9  
568 months. 2023. Available from: [https://www.gov.uk/government/publications/children-of-](https://www.gov.uk/government/publications/children-of-the-2020s-first-survey-of-families-at-age-9-months)  
569 [the-2020s-first-survey-of-families-at-age-9-months](https://www.gov.uk/government/publications/children-of-the-2020s-first-survey-of-families-at-age-9-months).
- 570 23. Smith MA. Health visiting: the public health role. *Journal of Advanced Nursing*.  
571 2004;45(1):17-25. <https://doi.org/10.1046/j.1365-2648.2003.02856.x>

- 572 24. Institute of Health Visiting. State of Health Visiting, UK survey report: Millions  
573 supported as others miss out. 2024.[https://ihv.org.uk/wp-content/uploads/2024/01/State-](https://ihv.org.uk/wp-content/uploads/2024/01/State-of-Health-Visiting-Report-2023-FINAL-VERSION-16.01.24.pdf)  
574 [of-Health-Visiting-Report-2023-FINAL-VERSION-16.01.24.pdf](https://ihv.org.uk/wp-content/uploads/2024/01/State-of-Health-Visiting-Report-2023-FINAL-VERSION-16.01.24.pdf)
- 575 25. Department of Health and Social Care, Department of Education. Family Hubs and  
576 Start for Life programme. 2023. Available from:  
577 <https://www.gov.uk/government/collections/family-hubs-and-start-for-life-programme>.
- 578 26. Katie H, Francesca LC, Catherine B, Amanda C, Sally K, Rebecca C, et al. Study  
579 protocol: evaluation of the 0–5 public health investment in England – a mixed-methods  
580 study integrating analyses of national linked administrative data with in-depth case studies.  
581 *BMJ Open*. 2023;13(4):e073313.10.1136/bmjopen-2023-073313
- 582 27. Woodman J, Mc Grath-Lone L, Clery A, Weatherly H, Jankovic D, Appleton JV, et al.  
583 Study protocol: a mixed-methods study to evaluate which health visiting models in England  
584 are most promising for mitigating the harms of adverse childhood experiences. *BMJ Open*.  
585 2022;12:e066880.doi:10.1136/bmjopen-2022-066880
- 586 28. Woodman J, Harron K, Hancock D. Which children in England see the health visiting  
587 team and how often? *Journal of Health Visiting*. 2021;9(7):282-  
588 4.10.12968/johv.2021.9.7.282
- 589 29. Launder M. Health visiting contacts to only count if face-to-face amid child safety  
590 concerns. 2022. Available from: [https://www.nursinginpractice.com/community-](https://www.nursinginpractice.com/community-nursing/face-to-face-health-visiting-contacts-to-return-amid-child-safety-concerns/)  
591 [nursing/face-to-face-health-visiting-contacts-to-return-amid-child-safety-concerns/](https://www.nursinginpractice.com/community-nursing/face-to-face-health-visiting-contacts-to-return-amid-child-safety-concerns/).
- 592 30. Morton A, Adams C. Health visiting in England: The impact of the COVID-19  
593 pandemic. *Public Health Nursing*. 2022;39(4):820-30.<https://doi.org/10.1111/phn.13053>
- 594 31. Conti G, Dow A. The impacts of COVID-19 on Health Visiting in England. 2020.  
595 Available from:  
596 [https://discovery.ucl.ac.uk/id/eprint/10106430/8/Conti\\_Dow\\_The%20impacts%20of%20CO](https://discovery.ucl.ac.uk/id/eprint/10106430/8/Conti_Dow_The%20impacts%20of%20COVID-19%20on%20Health%20Visiting%20in%20England%20250920.pdf)  
597 [VID-19%20on%20Health%20Visiting%20in%20England%20250920.pdf](https://discovery.ucl.ac.uk/id/eprint/10106430/8/Conti_Dow_The%20impacts%20of%20COVID-19%20on%20Health%20Visiting%20in%20England%20250920.pdf).
- 598 32. Public Health England. Contacts other than those mandated and referrals by health  
599 visitors - Experimental analysis of the Community Services Dataset. 2021. Available from:  
600 [https://www.gov.uk/government/publications/contacts-other-than-those-mandated-and-](https://www.gov.uk/government/publications/contacts-other-than-those-mandated-and-referrals-by-health-visitors)  
601 [referrals-by-health-visitors](https://www.gov.uk/government/publications/contacts-other-than-those-mandated-and-referrals-by-health-visitors).
- 602 33. NHS Benchmarking Network. Deep dive report for Health Visiting. 2020. Available  
603 from: [https://s3.eu-west-2.amazonaws.com/nhsbn-](https://s3.eu-west-2.amazonaws.com/nhsbn-static/Community%20Services/2020/CS%20Deep%20dive%20report%20-%20Health%20Visiting%20FINAL.pdf)  
604 [static/Community%20Services/2020/CS%20Deep%20dive%20report%20-%20Health%20Visi](https://s3.eu-west-2.amazonaws.com/nhsbn-static/Community%20Services/2020/CS%20Deep%20dive%20report%20-%20Health%20Visiting%20FINAL.pdf)  
605 [ting%20FINAL.pdf](https://s3.eu-west-2.amazonaws.com/nhsbn-static/Community%20Services/2020/CS%20Deep%20dive%20report%20-%20Health%20Visiting%20FINAL.pdf).
